# Supplementary material
Source: PubMed Central journal article supplement (PMC7116788)
Supplement: EMS114729-supplement-Supplementary_material.pdf [file EMS114729-supplement-Supplementary_material.pdf]

## Supplemental Information For:

### Structure of a proton-powered motor that drives protein transport and gliding motility

Rory Hennell James<sup>1,2\*</sup>, Justin C. Deme<sup>1,2,3\*</sup>, Andreas Kjær<sup>2</sup>, Felicity Alcock<sup>2,4</sup>, Augustinas Silale<sup>2,4</sup>, Frédéric Lauber<sup>2</sup>, Steven Johnson<sup>1</sup>, Ben C. Berks<sup>2†</sup>, and Susan M. Lea<sup>1,3†</sup>

<sup>1</sup> Sir William Dunn School of Pathology, University of Oxford, South Parks Road, Oxford OX1 3RE, United Kingdom.

<sup>2</sup> Department of Biochemistry, University of Oxford, South Parks Road, Oxford OX1 3QU, United Kingdom.

<sup>3</sup> The Central Oxford Structural Molecular Imaging Centre (COSMIC), University of Oxford, South Parks Road, Oxford OX1 3RQ, United Kingdom.

<sup>4</sup> Current address: CBCB, Newcastle University, NE17RU UK

\* These authors contributed equally to this work.

† To whom correspondence should be addressed. S.M.Lea ([susan.lea@path.ox.ac.uk](mailto:susan.lea@path.ox.ac.uk)); B.C.Berks ([ben.berks@bioch.ox.ac.uk](mailto:ben.berks@bioch.ox.ac.uk)).

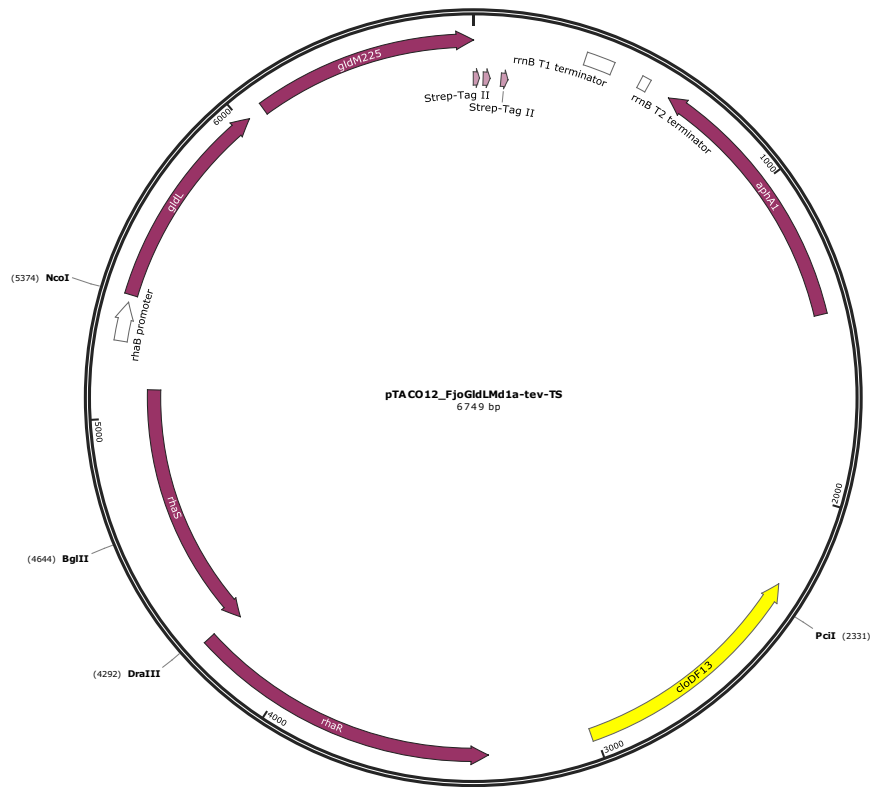

**Supplementary Figure 1.** Map of plasmid used for over-expression of GldLM' (see methods).

| Strain                           | Genotype                                                                                                                  | Reference                 |
|----------------------------------|---------------------------------------------------------------------------------------------------------------------------|---------------------------|
| <b><i>E. coli</i></b>            |                                                                                                                           |                           |
| S17-1                            | <i>pro, res<sup>-</sup> hsdR17 (rK<sup>-</sup> mk<sup>+</sup>) recA<sup>-</sup>, RP4-2-Tc::Mu-Km::Tn7, Tp<sup>r</sup></i> | (Simon et al., 1983)      |
| BL21 Star <sup>TM</sup><br>(DE3) | <i>F ompT hsdS<sub>B</sub> (r<sub>B</sub><sup>-</sup>, m<sub>B</sub><sup>-</sup>) gal dcm rne131 (DE3)</i>                | Invitrogen                |
| <b><i>F. johnsoniae</i></b>      |                                                                                                                           |                           |
| UW101                            |                                                                                                                           | (McBride and Braun, 2004) |
| Fl_004                           | UW101 $\Delta$ <i>sprA</i>                                                                                                | (Lauber et al., 2018)     |
| Fl_030                           | UW101 $\Delta$ <i>porV</i>                                                                                                | (Lauber et al., 2018)     |
| Fl_082                           | UW101 $\Delta$ <i>gldL</i>                                                                                                | This study                |
| Rhj_006                          | UW101 $\Delta$ <i>gldM</i>                                                                                                | This study                |
| Rhj_017                          | UW101 <i>gldL</i> <sub>N10A</sub>                                                                                         | This study                |
| Rhj_018                          | UW101 <i>gldL</i> <sub>Y13A</sub>                                                                                         | This study                |
| Rhj_024                          | UW101 <i>gldL</i> <sub>Y13F</sub>                                                                                         | This study                |
| Rhj_019                          | UW101 <i>gldL</i> <sub>K27A</sub>                                                                                         | This study                |
| Rhj_011                          | UW101 <i>gldL</i> <sub>H30A</sub>                                                                                         | This study                |
| Rhj_013                          | UW101 <i>gldL</i> <sub>S43A</sub>                                                                                         | This study                |
| Rhj_020                          | UW101 <i>gldL</i> <sub>T48A</sub>                                                                                         | This study                |
| Rhj_021                          | UW101 <i>gldL</i> <sub>E49A</sub>                                                                                         | This study                |
| Rhj_022                          | UW101 <i>gldL</i> <sub>E49Q</sub>                                                                                         | This study                |
| Rhj_025                          | UW101 <i>gldL</i> <sub>E49D</sub>                                                                                         | This study                |
| Rhj_023                          | UW101 <i>gldL</i> <sub>S56A</sub>                                                                                         | This study                |
| Rhj_035                          | UW101 <i>gldM</i> <sub>R9A</sub>                                                                                          | This study                |
| Rhj_032                          | UW101 <i>gldM</i> <sub>R9K</sub>                                                                                          | This study                |
| Rhj_029                          | UW101 <i>gldM</i> <sub>R9E</sub>                                                                                          | This study                |
| Rhj_012                          | UW101 <i>gldM</i> <sub>Q10A</sub>                                                                                         | This study                |

|         |                                      |            |
|---------|--------------------------------------|------------|
| Rhj_030 | UW101 <i>gldM</i> <sub>K11A</sub>    | This study |
| Rhj_016 | UW101 <i>gldM</i> <sub>N14A</sub>    | This study |
| Rhj_014 | UW101 <i>gldM</i> <sub>Y17A</sub>    | This study |
| Rhj_015 | UW101 <i>gldM</i> <sub>Y17F</sub>    | This study |
| Rhj_028 | UW101 <i>gldM</i> <sub>N27A</sub>    | This study |
| Ak_73   | UW101 $\Delta$ <i>porV halo-sprB</i> | This study |
| Ak_203  | AK_73 $\Delta$ <i>gldM</i>           | This study |
| Ak_205  | AK_73 $\Delta$ <i>gldL</i>           | This study |
| Ak_196  | AK_73 <i>gldL</i> <sub>Y13A</sub>    | This study |
| Ak_197  | AK_73 <i>gldL</i> <sub>H30A</sub>    | This study |
| Ak_198  | AK_73 <i>gldL</i> <sub>K27A</sub>    | This study |
| Ak_199  | AK_73 <i>gldM</i> <sub>Y17F</sub>    | This study |
| Ak_289  | AK_73 <i>gldM</i> <sub>R9K</sub>     | This study |

**Table S1 Bacterial strains used in this study.**



| Plasmid                       | Description <sup>a</sup>                                                                                                                                                                                     | Reference               |
|-------------------------------|--------------------------------------------------------------------------------------------------------------------------------------------------------------------------------------------------------------|-------------------------|
| pGEM-T                        | General cloning vector; Ap <sup>r</sup>                                                                                                                                                                      | Promega                 |
| pWALDO-sfGFPd                 | pET28(a+) derived expression vector fusing a TEV cleavage site, superfolder GFP, and a His <sub>6</sub> tag to the C-terminus of the expressed protein; Kan <sup>r</sup>                                     | (Drew et al., 2006)     |
| pCDFDuet-1                    | Co-expression of two <i>orfs</i> under the control of T7lac promoters; <i>ori</i> CDF, Sm <sup>r</sup>                                                                                                       | Novagen                 |
| pETDuet-1                     | Co-expression of two <i>orfs</i> under the control of T7lac promoters; <i>ori</i> ColE1, Ap <sup>r</sup>                                                                                                     | Novagen                 |
| pT12_SpaPQR <sup>3xFLAG</sup> | Encodes <i>Salmonella enterica</i> serovar Typhimurium <i>SpaPQR</i> operon with a C-terminal 3xFLAG tag on SpaR under the control of the <i>E. coli rhaB</i> promoter; <i>ori</i> cloDF13, Kan <sup>r</sup> | (Dietsche et al., 2016) |
| pYT313                        | <i>sacB</i> -containing mobilizable suicide vector; Ap <sup>r</sup> (Em <sup>r</sup> )                                                                                                                       | (Zhu et al., 2017)      |
| pYT354                        | <i>sacB</i> -containing mobilizable suicide vector; Ap <sup>r</sup> (Em <sup>r</sup> )                                                                                                                       | (Zhu et al., 2017)      |
| pRHJ006                       | pETDuet-1 <i>porL-(tev)-gfp-8xHis porM-twinstrep</i>                                                                                                                                                         | This study              |
| pRHJ007                       | pT12 <i>gldL gldM(1-225)-twinstrep</i>                                                                                                                                                                       | This study              |
| pRHJ008                       | pT12 <i>gldL gldM(1-232)-twinstrep</i>                                                                                                                                                                       | This study              |
| pRHJ011                       | Suicide plasmid used to delete <i>gldM</i> ; 2.7-kbp upstream and 2.5-kbp downstream of <i>gldM</i> in pYT354                                                                                                | This study              |
| pRHJ012                       | pGEM-T <i>gldL</i>                                                                                                                                                                                           | This study              |
| pRHJ013                       | pGEM-T <i>gldM</i>                                                                                                                                                                                           | This study              |
| pRHJ036                       | Suicide plasmid used to introduce the N10A codon change into <i>gldL</i> ; <i>gldL(N10A)</i> in pYT354                                                                                                       | This study              |
| pRHJ037                       | Suicide plasmid used to introduce the Y13A codon change into <i>gldL</i> ; <i>gldL(Y13A)</i> in pYT354                                                                                                       | This study              |
| pRHJ038                       | Suicide plasmid used to introduce the Y13F codon change into <i>gldL</i> ; <i>gldL(Y13F)</i> in pYT354                                                                                                       | This study              |
| pRHJ039                       | Suicide plasmid used to introduce the K27A codon change into <i>gldL</i> ; <i>gldL(K27A)</i> in pYT354                                                                                                       | This study              |
| pRHJ040                       | Suicide plasmid used to introduce the H30A codon change into <i>gldL</i> ; <i>gldL(H30A)</i> in pYT354                                                                                                       | This study              |
| pRHJ041                       | Suicide plasmid used to introduce the S43A codon change into <i>gldL</i> ; <i>gldL(S43A)</i> in pYT354                                                                                                       | This study              |
| pRHJ042                       | Suicide plasmid used to introduce the T48A codon change into <i>gldL</i> ; <i>gldL(T48A)</i> in pYT354                                                                                                       | This study              |
| pRHJ043                       | Suicide plasmid used to introduce the E49A codon change into <i>gldL</i> ; <i>gldL(E49A)</i> in pYT354                                                                                                       | This study              |
| pRHJ044                       | Suicide plasmid used to introduce the E49Q codon change into <i>gldL</i> ; <i>gldL(E49Q)</i> in pYT354                                                                                                       | This study              |
| pRHJ045                       | Suicide plasmid used to introduce the E49D codon change into <i>gldL</i> ; <i>gldL(E49D)</i> in pYT354                                                                                                       | This study              |
| pRHJ046                       | Suicide plasmid used to introduce the S56A codon change into <i>gldL</i> ; <i>gldL(S56A)</i> in pYT354                                                                                                       | This study              |
| pRHJ047                       | Suicide plasmid used to introduce the R9A codon change into <i>gldM</i> ; <i>gldM(R9A)</i> in pYT354                                                                                                         | This study              |
| pRHJ048                       | Suicide plasmid used to introduce the R9K codon change into <i>gldM</i> ; <i>gldM(R9K)</i> in pYT354                                                                                                         | This study              |
| pRHJ049                       | Suicide plasmid used to introduce the R9E codon change into <i>gldM</i> ; <i>gldM(R9E)</i> in pYT354                                                                                                         | This study              |
| pRHJ050                       | Suicide plasmid used to introduce the Q10A codon change into <i>gldM</i> ; <i>gldM(Q10A)</i> in pYT354                                                                                                       | This study              |
| pRHJ051                       | Suicide plasmid used to introduce the K11A codon change into <i>gldM</i> ; <i>gldM(K11A)</i> in pYT354                                                                                                       | This study              |
| pRHJ052                       | Suicide plasmid used to introduce the N14A codon change into <i>gldM</i> ; <i>gldM(N14A)</i> in pYT354                                                                                                       | This study              |
| pRHJ053                       | Suicide plasmid used to introduce the Y17A codon change into <i>gldM</i> ; <i>gldM(Y17A)</i> in pYT354                                                                                                       | This study              |
| pRHJ054                       | Suicide plasmid used to introduce the Y17F codon change into <i>gldM</i> ; <i>gldM(Y17F)</i> in pYT354                                                                                                       | This study              |

|         |                                                                                                                                                                                                 |                       |
|---------|-------------------------------------------------------------------------------------------------------------------------------------------------------------------------------------------------|-----------------------|
| pRHJ055 | Suicide plasmid used to introduce the N27A codon change into <i>gldM</i> ; <i>gldM(N27A)</i> in pYT354                                                                                          | This study            |
| pAK021  | Suicide plasmid used to insert a HaloTag domain after the signal peptide of SprB                                                                                                                | This study            |
| pFL43   | Expresses the cytoplasmic domain of GldL; pWALDO-sfGFPd <i>gldL(66-215)</i>                                                                                                                     | This study            |
| pFL44   | Expresses the periplasmic domain of GldM; pWALDO-sfGFPd <i>gldM(78-513)</i>                                                                                                                     | This study            |
| pFL80   | Suicide plasmid used to delete <i>porV</i> ; 2.5-kbp upstream and 2.5-kbp downstream of <i>porV</i> in pYT313                                                                                   | (Lauber et al., 2018) |
| pFL89   | Suicide plasmid used to delete <i>gldL</i> ; 2.6-kbp upstream and 2.5-kbp downstream of <i>gldL</i> in pYT313                                                                                   | This study            |
| pPG01   | Expresses the first 50 amino acids of RemA fused to mCherry and the C-terminal 97 amino acids of RemA; pCP-remA <sub>us</sub> -mch-CTD97 <sub>remA</sub>                                        | This study            |
| pPG02   | Expresses the first 50 amino acids of RemA fused to mCherry and the C-terminal 97 amino acids of RemA with the K1432A point mutation; pCP-remA <sub>us</sub> -mch-CTD97(K1432A) <sub>remA</sub> | This study            |

**Table S2 Plasmids used in this study.**

<sup>a</sup> Selection markers functional in *F. johnsoniae* are in brackets.

| Primer | Sequence 5'-3'                                                                 | Used in the construction of                   |
|--------|--------------------------------------------------------------------------------|-----------------------------------------------|
| FL125  | AAAAAAACATATGGAGGATGAATTAGATTGGACTCTAGTTTACCCAG                                | pFL43, NdeI site is underlined                |
| FL126  | AAAAATTTGGATCCTCTTTGTTACTCATTGCAGAAAGCATACCACC                                 | pFL43, BamHI site is underlined               |
| FL128  | AAAAAAAACATATGGCTCACAAAGTTCAGGCTGCTTCAAAG                                      | pFL44, NdeI site is underlined                |
| FL129  | AAAAAAGGATCCTTGATTTTCGTAATTACCGGAGCAGTTCTTGG                                   | pFL44, BamHI site is underlined               |
| FL309  | GCAGCGGAAAAATTCGGGGACGATTTAGAGCAAATGGTAAATATGG                                 | pFL89                                         |
| FL310  | ATTGCAGAAAGCATACCACCAGCGAAATTCATAACTTTTTACTTAATAATGCCAT                        | pFL89                                         |
| FL311  | GTA AAAAGTTATGAATTTTCGCTGGTGGTATGCTTTCTGCAATGAGTAAC                            | pFL89                                         |
| FL312  | GACCATGATTACGCCAAGCTTGCAGTACTTACGTGCATTTGG                                     | pFL89                                         |
| FL313  | CCCAATGCACGTGAAGTACTGCAAGCTTGGCGTAATCATGGTCATAG                                | pFL89                                         |
| FL314  | CCATTTGCTCTAAATCGTCCCGAATTTTTCCGCTGCATAACC                                     | pFL89                                         |
| AK39   | tggctccaagcgtcatatgagaaattaaatttgcgagtaggaggca                                 | pAK021                                        |
| AK37   | Actcgaaaatttaatttctcatatgagcgttggagccac                                        | pAK021                                        |
| AK40   | TTACGCCAAGCTTGCATGCcctcttcaggcaaaacaagcgact                                    | pAK021                                        |
| AK41   | cgcttgtttgcctgaagaggGCATGCAAGCTTGGCG                                           | pAK021                                        |
| AK59   | TGACCCCGAAGCAGGGTTAaatatcatctaatgcaagtcatttcaaaatcaacagc                       | pAK021                                        |
| AK60   | AGATTTCCGGTGAGCTcttttttaattcaagttgataaaaactgaaggaaaatatcttctaaaagc             | pAK021                                        |
| AK61   | ttatcaacttgaattaaagAGCTCACCGGAAATCTCCA                                         | pAK021                                        |
| AK62   | acttgacattagatgattATAACCCTGCTTCGGGGTCA                                         | pAK021                                        |
| RHJ025 | <u>TGGATCGGGAGGTT</u> CAGCGTGGAGCCACCCGAGTTCGAGAAATAACTCGAGTCTGGTA<br>AAGAAACC | pRHJ006, twinstrep tag sequence is underlined |
| RHJ026 | <u>CCGCCAGAACCTCCACCTTTTTCGAACTGCGGGTGGCTCCAAGCGTGGTACCGACGTCA</u><br>GCGAT    | pRHJ006, twinstrep tag sequence is underlined |
| RHJ046 | CCAGAGTCGGCCA <u>AGGAACCGGCAGTT</u>                                            | pRHJ006, mutated residues are underlined      |
| RHJ047 | CCAGAGTCGGCCA <u>AGGAACCGGCAGTT</u>                                            | pRHJ006, mutated residues are underlined.     |
| RHJ051 | GCGCGCC <u>CATGGGTC</u> ATTATAGAAGATACAAG                                      | pRHJ006, NcoI site underlined                 |
| RHJ052 | AAAAAA <u>GGATCCT</u> AAGGGTGAGCTGCC                                           | pRHJ006, BamHI site underlined                |
| RHJ057 | GCACGT <u>CATATGGCAGT</u> AGGTTCTAATGG                                         | pRHJ006, NdeI site underlined                 |



|        |                                                     |                                                    |
|--------|-----------------------------------------------------|----------------------------------------------------|
| RHJ058 | AACCAAG <u>GTACCG</u> TTTCAACAATTACTTCAATGGC        | pRHJ006, KpnI site underlined                      |
| RHJ110 | AAAAAAG <u>GATCCT</u> CCGCTGGAAGAAGAGGAAC           | pRHJ011, BamHI site underlined                     |
| RHJ111 | AAAAAAGTCGACCTGTCTAGGGGTTAATTTCTCC                  | sequencing                                         |
| RHJ112 | AAAAAAGTCGACCAAGAAGCTCCGGTAATTTAC                   | sequencing                                         |
| RHJ113 | AAAAAAG <u>GTACCA</u> AGCCTCTGCAATTCTGAAG           | pRHJ011, KpnI site underlined                      |
| RHJ114 | CAGTTGAGGATGAATTAGATTGG                             | screening for <i>gldM</i> mutations and sequencing |
| RHJ115 | TAGAAGGTCGACCTCCAGCATAGAAACAATAGC                   | screening for <i>gldM</i> mutations and sequencing |
| RHJ117 | AAAAAAGTCGACCATAACTTTTTTACTTAATAATGCCAT             | sequencing                                         |
| RHJ118 | GATGAGTATTATGCTGAAGTAATGG                           | sequencing                                         |
| RHJ123 | AAAAAAGGTACCAGAAGCAGCAGCAACTG                       | sequencing                                         |
| RHJ124 | AAAAAAGGATCCTTACCTAATGCACTGTTGTAACG                 | sequencing                                         |
| RHJ144 | GTCGACCATATGGGAGAGCTCC                              | pRHJ010                                            |
| RHJ145 | GCATGCGACGTCGGGCC                                   | pRHJ010                                            |
| RHJ146 | CCCGACGTCGCATGCGGCTGAGCCTGTATTTGAGATG               | pRHJ012                                            |
| RHJ147 | TCTCCATATGGTCGACACAAGCCTCTGCAATTCTCG                | pRHJ010 and pRHJ013                                |
| RHJ148 | CCCGACGTCGCATGCTCCGCTGGAAGAAGAGGAAGTTGTG            | pRHJ010 and pRHJ013                                |
| RHJ149 | TCTCCATATGGTCGACCAGTACTTACGTCATTTGGGAAG             | pRHJ012                                            |
| RHJ154 | CTCAAGTAACAGGAGGCCG                                 | screening for <i>gldL</i> mutations and sequencing |
| RHJ155 | AAGAAATGTCTATGGCAGCTGC                              | sequencing                                         |
| RHJ156 | GCTTCAGCAGCTTTTGTATC                                | screening for <i>gldL</i> mutations                |
| RHJ157 | AGTCCGATCTGAGCAGGAG                                 | sequencing                                         |
| RHJ160 | AGTTCTTGGTCTGTCTAGGGGTTAATTTCTCTCTGC                | pRHJ010                                            |
| RHJ161 | CCTAGACAGACCAAGAAGCTCCGGTAATT                       | pRHJ010 and sequencing                             |
| RHJ162 | GAAAACCTGTAATTCAGG                                  | pRHJ007, pRHJ008, pRHJ009                          |
| RHJ163 | GGTGAATTCCTCTGAATTC                                 | pRHJ007, pRHJ008, pRHJ009                          |
| RHJ164 | AAATTCAGGAGGAATTCACCATGGCATTATTAAGTAAAAAGTTATGAATTT | pRHJ007                                            |
| RHJ165 | CCTGGAAGTACAGTTTTCTTACCTAATGCACTGTTGTAAAC           | pRHJ007                                            |
| RHJ166 | AAATTCAGGAGGAATTCACCATGGCATTATTAAGTAAAAAGTTATGAATTT | pRHJ008                                            |
| RHJ167 | CCTGGAAGTACAGTTTTCAGAAGCAGCAGCAACT                  | pRHJ008                                            |
| RHJ168 | AAATTCAGGAGGAATTCACCATGGGTCATTATAGAAGATACAAGAAC     | pRHJ009                                            |

|        |                                                        |                                                           |
|--------|--------------------------------------------------------|-----------------------------------------------------------|
| RHJ169 | CCTGGAAGTACAGGTTTTCTTTACCAGATCGGCAAGT                  | pRHJ009                                                   |
| RHJ174 | CGGCTGTGGTAAGTCAGG                                     | sequencing                                                |
| RHJ175 | CAGCACTTCCAATTTCTTTCG                                  | sequencing                                                |
| RHJ269 | ACCTGATG <u>G</u> CTCTGGTTTTTCATCGCAATG                | <i>gldM</i> (Y17A) mutations, mutation site is underlined |
| RHJ270 | AAACCAGAG <u>C</u> CATCAGGTTAATCATCTTCTG               | <i>gldM</i> (Y17A) mutations, mutation site is underlined |
| RHJ271 | TAGCAATG <u>G</u> CGTATCAAAGAAGTTATTTCTGC              | <i>gldM</i> (N27A) mutations, mutation site is underlined |
| RHJ272 | TTGATACG <u>G</u> CATTGCTAACATTGCGATG                  | <i>gldM</i> (N27A) mutations, mutation site is underlined |
| RHJ273 | CTTTATTCG <u>C</u> AATTACTCACITTTGAGATTGGG             | <i>gldL</i> (K27A) mutations, mutation site is underlined |
| RHJ274 | TGAGTAATT <u>C</u> CGAATAAAGCTCCAACGATTACC             | <i>gldL</i> (K27A) mutations, mutation site is underlined |
| RHJ275 | AAATACTG <u>C</u> CTTTGAGATTGGCCATTAAC                 | <i>gldL</i> (H30A) mutations, mutation site is underlined |
| RHJ276 | ATCTCAAAG <u>G</u> CAGTAATTTGAATAAAGCTCCAAC            | <i>gldL</i> (H30A) mutations, mutation site is underlined |
| RHJ277 | TTTTGACTG <u>C</u> GGCATTAAATCTTTGCGTTATCTG            | <i>gldL</i> (E49A) mutations, mutation site is underlined |
| RHJ278 | ATTAATGCC <u>G</u> CAGTCAAAGACCGATAGAAAAG              | <i>gldL</i> (E49A) mutations, mutation site is underlined |
| RHJ279 | GTCTTTTGCTGAG <u>G</u> CATTAATCTTTGCG                  | <i>gldL</i> (T48A) mutations, mutation site is underlined |
| RHJ280 | TGCCTCAG <u>C</u> CAAAGACCGATAGAAAAGCATC               | <i>gldL</i> (T48A) mutations, mutation site is underlined |
| RHJ281 | GTCTACACGAACCTTTGG                                     | sequencing                                                |
| RHJ310 | AAGTTATG <u>G</u> CTTTTCGCTTATGGTATGGGAG               | <i>gldL</i> (N10A) mutations, mutation site is underlined |
| RHJ311 | AAGCGAAAG <u>C</u> CATAACTTTTTTACTTAATAATGCCATAATAATTC | <i>gldL</i> (N10A) mutations, mutation site is underlined |
| RHJ312 | ATTCGCT <u>G</u> CTGGTATGGGAGCGGC                      | <i>gldL</i> (Y13A) mutations, mutation site is underlined |
| RHJ313 | CCATACCAG <u>C</u> AGCGAAATTCATAACTTTTTTACTTAATAATG    | <i>gldL</i> (Y13A) mutations, mutation site is underlined |
| RHJ314 | TGATGCTT <u>G</u> CTATCGGTCTTTGACTGAGG                 | <i>gldL</i> (S43A) mutations, mutation site is underlined |
| RHJ315 | GACCGATAG <u>C</u> AAGCATCACTGTCCCTG                   | <i>gldL</i> (S43A) mutations, mutation site is underlined |

|        |                                                    |                                                          |
|--------|----------------------------------------------------|----------------------------------------------------------|
| RHJ316 | TTGCGTTA <u>CTG</u> CTTTTGAACCAGTTGAG              | <i>gldL(S56A)</i> mutations, mutation site is underlined |
| RHJ317 | AAAAGCAG <u>CT</u> AACGCAAAGATTAATGCCTC            | <i>gldL(S56A)</i> mutations, mutation site is underlined |
| RHJ318 | CCTGATGT <u>TT</u> CTGGTTTTTCATCGCAATG             | <i>gldM(Y17F)</i> mutations, mutation site is underlined |
| RHJ319 | AAACCAGAA <u>AC</u> ATCAGGTTAATCATCTTCTG           | <i>gldM(Y17F)</i> mutations, mutation site is underlined |
| RHJ320 | CCCCTAGAG <u>CG</u> AAGATGATTAACCTGATGTATCTG       | <i>gldM(Q10A)</i> mutations, mutation site is underlined |
| RHJ321 | TCATCTT <u>CG</u> CTAGGGGTTAATTTTCCTCCTG           | <i>gldM(Q10A)</i> mutations, mutation site is underlined |
| RHJ322 | TTTTGACT <u>C</u> AGGCATTAATCTTTGCGTTATC           | <i>gldL(E49Q)</i> mutations, mutation site is underlined |
| RHJ323 | TAATGCCT <u>G</u> AGTCAAAGACCGATAGAAAGC            | <i>gldL(E49Q)</i> mutations, mutation site is underlined |
| RHJ341 | CGGCCGCTCTAGAACTAGTGGATCCGCTGAGCCTGATTTTCGAG       | suicide vectors for <i>gldL</i> mutations                |
| RHJ342 | TACCGGGCCCCCTCGAGGTCGACCAGTACTTCACG                | suicide vectors for <i>gldL</i> mutations                |
| RHJ343 | CGGCCGCTCTAGAACTAGTGGATCCGCTGGAAGAAGAGG            | suicide vectors for <i>gldM</i> mutations                |
| RHJ344 | TACCGGGCCCCCTCGAGGTCGACCAAGCCTCTGCAATTC            | suicide vectors for <i>gldM</i> mutations                |
| RHJ345 | CCTGACTTACCACAGCCG                                 | sequencing                                               |
| RHJ346 | CGTCATTTTTGATCCGCGG                                | verifying <i>F. johnsoniae</i> co-integrants             |
| RHJ347 | CTCCGGTAAACATTACGGC                                | verifying <i>F. johnsoniae</i> co-integrants             |
| RHJ348 | TTTCGCTT <u>TT</u> TGGTATGGGAGCGGC                 | <i>gldL(Y13F)</i> mutations, mutation site is underlined |
| RHJ349 | CCATACCA <u>AA</u> AGCGAAATTCATAACTTTTTACTTAATAATG | <i>gldL(Y13F)</i> mutations, mutation site is underlined |
| RHJ350 | TTGACTGA <u>TG</u> CATTAATCTTTGCGTTATCTG           | <i>gldL(E49D)</i> mutations, mutation site is underlined |
| RHJ351 | ATTAATGC <u>AT</u> CAGTCAAAGACCGATAGAAAG           | <i>gldL(E49D)</i> mutations, mutation site is underlined |
| RHJ352 | TAACCCCT <u>G</u> CACAGAAGATGATTAACCTGATGTATC      | <i>gldM(R9A)</i> mutations, mutation site is underlined  |
| RHJ353 | TCTTCTGT <u>G</u> CAGGGGTTAATTTTCCTCCTG            | <i>gldM(R9A)</i> mutations, mutation site is underlined  |
| RHJ354 | AACCCCTA <u>AA</u> CAGAAGATGATTAACCTGATG           | <i>gldM(R9K)</i> mutations, mutation site is underlined  |
| RHJ355 | TCTTCTGT <u>TT</u> TAGGGGTTAATTTTCCTCCTG           | <i>gldM(R9K)</i> mutations, mutation site is underlined  |

|        |                                                |                                                                                         |
|--------|------------------------------------------------|-----------------------------------------------------------------------------------------|
| RHJ356 | TAACCCCT <u>G</u> ACAGAGAAGATGATTAACCTGATG     | <i>gldM(R9E)</i> mutations, mutation site is underlined                                 |
| RHJ357 | TCTTCTGT <u>C</u> AGGGGTTAATTTTCCTCTG          | <i>gldM(R9E)</i> mutations, mutation site is underlined                                 |
| RHJ358 | CTAGACAG <u>G</u> CGATGATTAACCTGATGTATCTGGTTTC | <i>gldM(K11A)</i> mutations, mutation site is underlined                                |
| RHJ359 | TTAATCATC <u>G</u> CCTGTCTAGGGGTTAATTTCC       | <i>gldM(K11A)</i> mutations, mutation site is underlined                                |
| RHJ360 | TACCGGGCCCCCTCGAGGTCGACCAGTACTTCACGTGCATTG     | suicide vectors for <i>gldM</i> mutations                                               |
| PG001  | AGCTAGT <u>C</u> TAGAACGTTCTGATAGGCACAAAAATG   | pCP-remA <sub>us</sub> -mch-CTD97 <sub>remA</sub> , XbaI site is underlined             |
| PG002  | AGCTAG <u>A</u> CTAGTGCATTAGTTGGCATTCCAGG      | pCP-remA <sub>us</sub> -mch-CTD97 <sub>remA</sub> , SpeI site is underlined             |
| PG003  | CGTT <u>A</u> CTAGTATGGTGAGCAAGGGCGAGGAGGATAAC | pCP-remA <sub>us</sub> -mch-CTD97 <sub>remA</sub> , SpeI site is underlined             |
| PG004  | GACAG <u>A</u> GCTCCTGTACAGCTCGTCCATGCC        | pCP-remA <sub>us</sub> -mch-CTD97 <sub>remA</sub> , SacI site is underlined             |
| PG005  | GACAG <u>A</u> GCTCGATCGTTTTGCACTTCGTTACAC     | pCP-remA <sub>us</sub> -mch-CTD97 <sub>remA</sub> , SacI site is underlined             |
| PG006  | GGAC <u>G</u> TCGACGTCTTACTTGCAAATGGATTTTT     | pCP-remA <sub>us</sub> -mch-CTD97 <sub>remA</sub> , Sall site is underlined             |
| PG007  | GCCCAGATAACCAG <u>A</u> GCGATCTTTAAATAG        | pCP-remA <sub>us</sub> -mch-CTD97 <sub>remA(K1433A)</sub> , mutation site is underlined |
| PG008  | CTATTTAAAGATCACT <u>G</u> CTCTGGTTATCTGGGC     | pCP-remA <sub>us</sub> -mch-CTD97 <sub>remA(K1433A)</sub> , mutation site is underlined |

**Table S3. Oligonucleotides used in this study.**

**Supplemental Video 1:** Mutant strains gliding on glass. Wild type, *gldL*<sub>Y13A</sub>, *gldL*<sub>Y13F</sub>, *gldL*<sub>K27A</sub>, *gldL*<sub>H30A</sub>, *gldL*<sub>E49D</sub>, *gldM*<sub>R9K</sub>, *gldM*<sub>Y17A</sub> and *gldM*<sub>Y17F</sub> cells are shown.

**Supplemental Video 2:** Fluorophore-labelled SprB adhesin moving on the surface of a wild type cell.

**Supplemental Video 3:** Fluorophore-labelled SprB adhesin moving on the surface of a *gldL*<sub>Y13A</sub> cell.

**Supplemental Video 4:** Fluorophore-labelled SprB adhesin moving on the surface of a *gldL*<sub>K27A</sub> cell.

**Supplemental Video 5:** Fluorophore-labelled SprB adhesin moving on the surface of a *gldL*<sub>H30A</sub> cell.

**Supplemental Video 6:** Fluorophore-labelled SprB adhesin moving on the surface of a *gldM*<sub>R9K</sub> cell.

**Supplemental Video 7:** Fluorophore-labelled SprB adhesin moving on the surface of a *gldM*<sub>Y17F</sub> cell.

**Supplemental Video 8:** Animation of a rotary model of GldLM mechanism.
